# Supplementary material for: Impact of Age and Sex Interaction on Post-Acute Sequelae of COVID-19: An Italian Cohort Study on Adults and Children
Source: MDPI journal article supplement (doi:10.3390/jcm12082924), 2023-04-18

## Supplemental material:

**Table S1.** Categorisation of post-COVID-19 symptoms

**Table S2.** Number of subjects interviewed and timing of the interviews in adults and children

**Table S3.** Frequency of post-COVID-19 symptoms in categories, by sex and age classes, *males, n (%) / females, n (%)*

**Table S4.** Vaccination status in adults and children analysed, at the time of the last survey, *n (%)*

**Figure S1:** Kaplan-Meier estimates of cumulative reported frequency of post-COVID-19 symptoms in the whole cohort, by sex. Numbers in parentheses represent the number of symptoms that were reported within each time interval, by sex.

**Figure S2:** Kaplan-Meier estimates of cumulative reported frequency of post-COVID-19 symptoms in the whole cohort, by age class. Numbers in parentheses represent the number of symptoms that were reported within each time interval, by age class.

**Figure S3:** Kaplan-Meier estimates of cumulative reported frequency of post-COVID-19 symptoms, by sex, (A) in subjects aged 0-5y, (B) 6-11y, (C) 12-17y, (D) 18-50y, (E) 51-64y and (F) 65+y. Numbers in parentheses represent the number of symptoms that were reported within each time interval, by sex. The estimate of the hazard ratio (HR) was based on a Cox proportional hazards regression model, adjusted for age.

**Figure S4:** Forest plot of the risk estimate (hazard ratio, HR) of post-COVID-19 symptoms for females vs. males in each symptom category, stratified by age group, in pediatric outpatients. HRs are adjusted for age. Abbreviations: P-inter., p-value for the sex\*age interaction term in the Cox model. Note: HR for sensory symptoms in 0-5y group was not estimable because of lack of events; data are from all the surveys collected.

**Figure S5:** Forest plot of the risk estimate (hazard ratio, HR) of post-COVID-19 symptoms for females vs. males in each symptom category, stratified by age group, in hospitalized adults. HRs are adjusted for age. Abbreviations: P-inter., p-value for the sex\*age interaction term in the Cox model; data are from all the surveys collected.

**Figure S6:** Forest plot of the risk estimate (hazard ratio, HR) of post-COVID-19 symptoms for females vs. males in each symptom category, stratified by age group, excluding data from the 1<sup>st</sup> survey of pediatric outpatients. HRs are adjusted for age. Abbreviations: P-inter., p-value for the sex\*age interaction term in the Cox model. Note: HR for sensory symptoms in 0-5y group was not estimable because of lack of events.

**Figure S7:** Forest plot of the risk estimate (hazard ratio, HR) of post-COVID-19 symptoms for females vs. males in each symptom category, stratified by age group, in pediatric outpatients, excluding data from the 1<sup>st</sup> survey. HRs are adjusted for age. Abbreviations: P-inter., p-value for the sex\*age interaction term in the Cox model. Note: HR for sensory symptoms in 0-5y group was not estimable because of lack of events.

Table S1. Categorisation of post-COVID-19 symptoms.

| <b>Category</b>                        | <b>Symptoms</b>                                                                                                                                                                                                                                                                                                                                                                    |
|----------------------------------------|------------------------------------------------------------------------------------------------------------------------------------------------------------------------------------------------------------------------------------------------------------------------------------------------------------------------------------------------------------------------------------|
| Musculoskeletal                        | Joint pain or swelling, Persistent muscle pain, Weakness arms/legs or muscle weakness.                                                                                                                                                                                                                                                                                             |
| Cardiovascular                         | Palpitations (heart racing), Variations in heart rate (tachycardia or bradycardia).                                                                                                                                                                                                                                                                                                |
| Respiratory                            | Shortness of breath/ breathlessness, Pain on breathing, Persistent cough, Chest pain, Nasal congestion/rhinorrea.                                                                                                                                                                                                                                                                  |
| Neurological and cognitive dysfunction | Cannot fully move or control movement, Problems with balance, Tremor/shakiness, Seizures, Tingling feeling/“pins and needles”, Confusion/lack of concentration, Problems speaking or communicating, Fainting/ blackouts, Dizziness/ light headedness, Problems seeing/blurred vision, Headache, problems swallowing or chewing, ringing in ears, can’t feel one side of body/face. |
| Dermatological                         | Hair loss, Skin rash, Lumpy lesions on toes,                                                                                                                                                                                                                                                                                                                                       |
| Gastrointestinal                       | Constipation, Diarrhoea, Stomach/ abdominal pain, Vomiting                                                                                                                                                                                                                                                                                                                         |
| Sensory                                | Loss of smell, Loss of taste                                                                                                                                                                                                                                                                                                                                                       |
| Sleep                                  | Problems sleeping, Hypersomnia (children only)                                                                                                                                                                                                                                                                                                                                     |
| Fatigue                                | Fatigue                                                                                                                                                                                                                                                                                                                                                                            |
| Poor appetite/Weight loss              | Poor appetite, Weight loss (adults only)                                                                                                                                                                                                                                                                                                                                           |

Table S2. Number of subjects interviewed and timing of the interviews in adults and children

|                                                                                | No. subjects surveyed | time from discharge, months, median (IQR)                                |
|--------------------------------------------------------------------------------|-----------------------|--------------------------------------------------------------------------|
| Adults (n=518):                                                                |                       |                                                                          |
| 1 <sup>st</sup> survey (expected 1-3 mos after hospital discharge)             | 450                   | 3.3 (2.4-4.3)                                                            |
| 2 <sup>nd</sup> survey (expected 3 mos after 1 <sup>st</sup> survey)           | 362                   | 6.9 (5.9-8.4)                                                            |
| 3 <sup>rd</sup> survey (expected 6 mos after 1 <sup>st</sup> survey)           | 227                   | 9.9 (8.7-11.4)                                                           |
| 4 <sup>th</sup> survey (expected 9 mos after 1 <sup>st</sup> survey)           | 125                   | 12.4 (11.6-13.2)                                                         |
| 5 <sup>th</sup> survey (expected 12 mos after 1 <sup>st</sup> survey)          | 81                    | 15.3 (14.6-16.3)                                                         |
| Children (n=1,010):                                                            |                       |                                                                          |
| 1 <sup>st</sup> survey (expected 1-3 mos after 1 <sup>st</sup> COVID symptom)  | 905                   | time from 1 <sup>st</sup> symptom, months, median (IQR)<br>2.4 (2.0-2.9) |
| 2 <sup>nd</sup> survey (expected 3-6 mos after 1 <sup>st</sup> COVID symptom)  | 559                   | 5.4 (5.0-5.9)                                                            |
| 3 <sup>rd</sup> survey (expected 6-12 mos after 1 <sup>st</sup> COVID symptom) | 328                   | 8.4 (8.0-8.8)                                                            |
| Abbreviations: IQR, interquartile range                                        |                       |                                                                          |

Table S3. Frequency of post-COVID-19 symptoms in categories, by sex and age classes, *males, n (%) / females, n (%)*\*

|                                           | 0-5y<br>(n=128/102)              | 6-11y<br>(n=282/249)               | 12-50y<br>(n=128/151)             | >50y<br>(n=201/136)                | All children<br>(n=482/443)        | All adults<br>(n=257/195)          |
|-------------------------------------------|----------------------------------|------------------------------------|-----------------------------------|------------------------------------|------------------------------------|------------------------------------|
| Musculoskeletal pain                      | 3 (2.3) / 2 (2.0)<br>p>0.99      | 33 (11.7) / 25 (10.0)<br>p=0.579   | 41 (32.0) / 55 (36.4)<br>p=0.451  | 121 (60.2) / 89 (65.4)<br>p=0.360  | 44 (9.1) / 40 (9.0)<br>p>0.99      | 154 (59.9) / 131 (67.2)<br>p=0.117 |
| Cardiovascular                            | 2 (1.6) / 1 (1.0)<br>p>0.99      | 10 (3.6) / 9 (3.6)<br>p>0.99       | 20 (15.6) / 49 (32.5)<br>p=0.001  | 49 (24.4) / 50 (36.8)<br>p=0.015   | 14 (2.9) / 26 (5.9)<br>p=0.034     | 67 (26.1) / 83 (42.6)<br>p<0.001   |
| Respiratory                               | 57 (44.5) / 39 (38.2)<br>p=0.349 | 102 (36.2) / 84 (33.7)<br>p=0.585  | 47 (36.7) / 65 (43.1)<br>p=0.327  | 110 (54.7) / 90 (66.2)<br>p=0.042  | 174 (36.1) / 155 (35.0)<br>p=0.732 | 142 (55.3) / 123 (63.1)<br>p=0.102 |
| Neurological and<br>cognitive dysfunction | 11 (8.6) / 11 (10.8)<br>p=0.654  | 77 (27.3) / 89 (35.7)<br>p=0.039   | 53 (41.4) / 88 (58.3)<br>p=0.006  | 125 (62.2) / 98 (72.1)<br>p=0.062  | 107 (22.2) / 145 (32.7)<br>p<0.001 | 159 (61.9) / 141 (72.3)<br>p=0.021 |
| Dermatological                            | 14 (10.9) / 6 (5.9)<br>p=0.240   | 18 (6.4) / 17 (6.8)<br>p=0.862     | 16 (12.5) / 19 (12.6)<br>p>0.99   | 33 (16.4) / 39 (28.7)<br>p=0.010   | 35 (7.3) / 28 (6.3)<br>p=0.603     | 46 (17.9) / 53 (27.2)<br>p=0.022   |
| Gastrointestinal                          | 26 (20.3) / 18 (17.7)<br>p=0.736 | 57 (20.2) / 50 (20.1)<br>p>0.99    | 26 (20.3) / 53 (35.1)<br>p=0.008  | 68 (33.8) / 62 (45.6)<br>p=0.031   | 92 (19.1) / 86 (19.4)<br>p=0.934   | 85 (33.1) / 97 (49.7)<br>p<0.001   |
| Sensory                                   | 2 (1.6) / 0 (-)<br>p=0.504       | 3 (1.1) / 4 (1.6)<br>p=0.711       | 10 (7.8) / 18 (11.9)<br>p=0.319   | 30 (14.9) / 21 (15.4)<br>p>0.99    | 9 (1.9) / 10 (2.3)<br>p=817        | 36 (14.0) / 33 (16.9)<br>p=0.429   |
| Sleep                                     | 25 (19.5) / 10 (9.8)<br>p=0.044  | 43 (15.3) / 38 (15.3)<br>p>0.99    | 30 (23.4) / 60 (39.7)<br>p=0.005  | 82 (40.8) / 72 (52.9)<br>p=0.034   | 81 (16.8) / 80 (18.1)<br>p=0.664   | 99 (38.5) / 100 (51.3)<br>p=0.007  |
| Fatigue                                   | 10 (7.8) / 4 (3.9)<br>p=0.274    | 62 (22.0) / 57 (22.9)<br>p=0.835   | 51 (39.8) / 76 (50.3)<br>p=0.092  | 120 (59.7) / 96 (70.6)<br>p=0.049  | 88 (18.3) / 98 (22.1)<br>p=0.163   | 155 (60.3) / 135 (69.2)<br>p=0.060 |
| Poor appetite/Weight<br>loss              | 23 (18.0) / 12 (11.8)<br>p=0.203 | 34 (12.1) / 39 (15.7)<br>p=0.256   | 19 (14.8) / 27 (17.9)<br>p=0.521  | 37 (18.4) / 40 (29.4)<br>p=0.024   | 65 (13.5) / 68 (15.4)<br>p=0.453   | 48 (18.7) / 50 (25.6)<br>p=0.084   |
| <i>Any symptom (at<br/>least 1)</i>       | 83 (64.8) / 53 (52.0)<br>p=0.059 | 173 (61.4) / 166 (66.7)<br>p=0.207 | 83 (64.8) / 114 (75.5)<br>p=0.065 | 166 (82.6) / 120 (88.2)<br>p=0.167 | 293 (60.8) / 282 (63.7)<br>p=0.378 | 212 (82.5) / 171 (87.7)<br>p=0.147 |

Abbreviations: y, years old. \*Fisher exact p-values are shown.

Table S4. COVID-19 vaccination status in adults and children analysed, at the time of the last survey, n (%)

|                              | Hospitalized adults<br>(n=452) | Pediatric outpatients<br>(n=925) |
|------------------------------|--------------------------------|----------------------------------|
| Yes (at least 1 dose)        | 360 (79.7)                     | 198 (21.4)                       |
| 2 doses                      | 244 (54.0)                     | 106 (11.5)                       |
| 3 doses ("booster")          | 130 (28.8)                     | 26 (2.8)                         |
| No                           | 88 (19.5)                      | 725 (78.4)                       |
| "Don't know" or not compiled | 4 (0.9)                        | 2 (0.2)                          |

## **Supplementary figures:**

**Figure S1:** Kaplan-Meier estimates of cumulative reported frequency of post-COVID-19 symptoms in the whole cohort, by sex. Numbers in parentheses represent the number of symptoms that were reported within each time interval, by sex.

**Figure S2:** Kaplan-Meier estimates of cumulative reported frequency of post-COVID-19 symptoms in the whole cohort, by age class. Numbers in parentheses represent the number of symptoms that were reported within each time interval, by age class.

**Figure S3:** Kaplan-Meier estimates of cumulative reported frequency of post-COVID-19 symptoms, by sex, (A) in subjects aged 0-5y, (B) 6-11y, (C) 12-17y, (D) 18-50y, (E) 51-64y and (F) 65+y. Numbers in parentheses represent the number of symptoms that were reported within each time interval, by sex. The estimate of the hazard ratio (HR) was based on a Cox proportional hazards regression model, adjusted for age.

**Figure S4:** Forest plot of the risk estimate (hazard ratio, HR) of post-COVID-19 symptoms for females vs. males in each symptom category, stratified by age group, in pediatric outpatients. HRs are adjusted for age. Abbreviations: P-inter., p-value for the sex\*age interaction term in the Cox model. Note: HR for sensory symptoms in 0-5y group was not estimable because of lack of events.

**Figure S5:** Forest plot of the risk estimate (hazard ratio, HR) of post-COVID-19 symptoms for females vs. males in each symptom category, stratified by age group, in hospitalized adults patients. HRs are adjusted for age. Abbreviations: P-inter., p-value for the sex\*age interaction term in the Cox model.

**Figure S6:** Forest plot of the risk estimate (hazard ratio, HR) of post-COVID-19 symptoms for females vs. males in each symptom category, stratified by age group, excluding data from the 1<sup>st</sup> survey of pediatric outpatients. HRs are adjusted for age. Abbreviations: P-inter., p-value for the sex\*age interaction term in the Cox model. Note: HR for sensory symptoms in 0-5y group was not estimable because of lack of events.

**Figure S7:** Forest plot of the risk estimate (hazard ratio, HR) of post-COVID-19 symptoms for females vs. males in each symptom category, stratified by age group, in pediatric

outpatients, excluding data from the 1<sup>st</sup> survey. HRs are adjusted for age. Abbreviations: P-inter., p-value for the sex\*age interaction term in the Cox model. Note: HR for sensory symptoms in 0-5y group was not estimable because of lack of events.



Figure S1

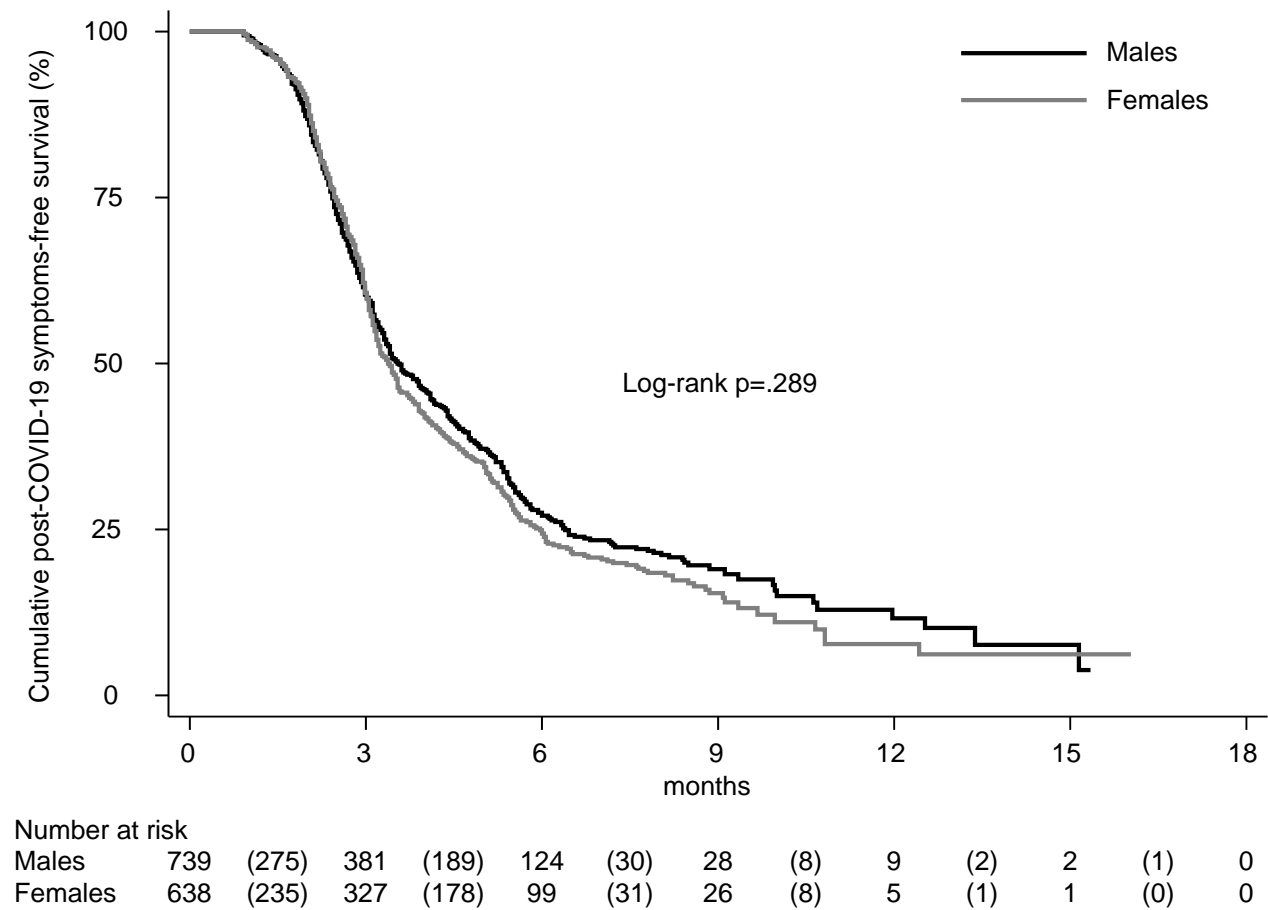

Figure S2

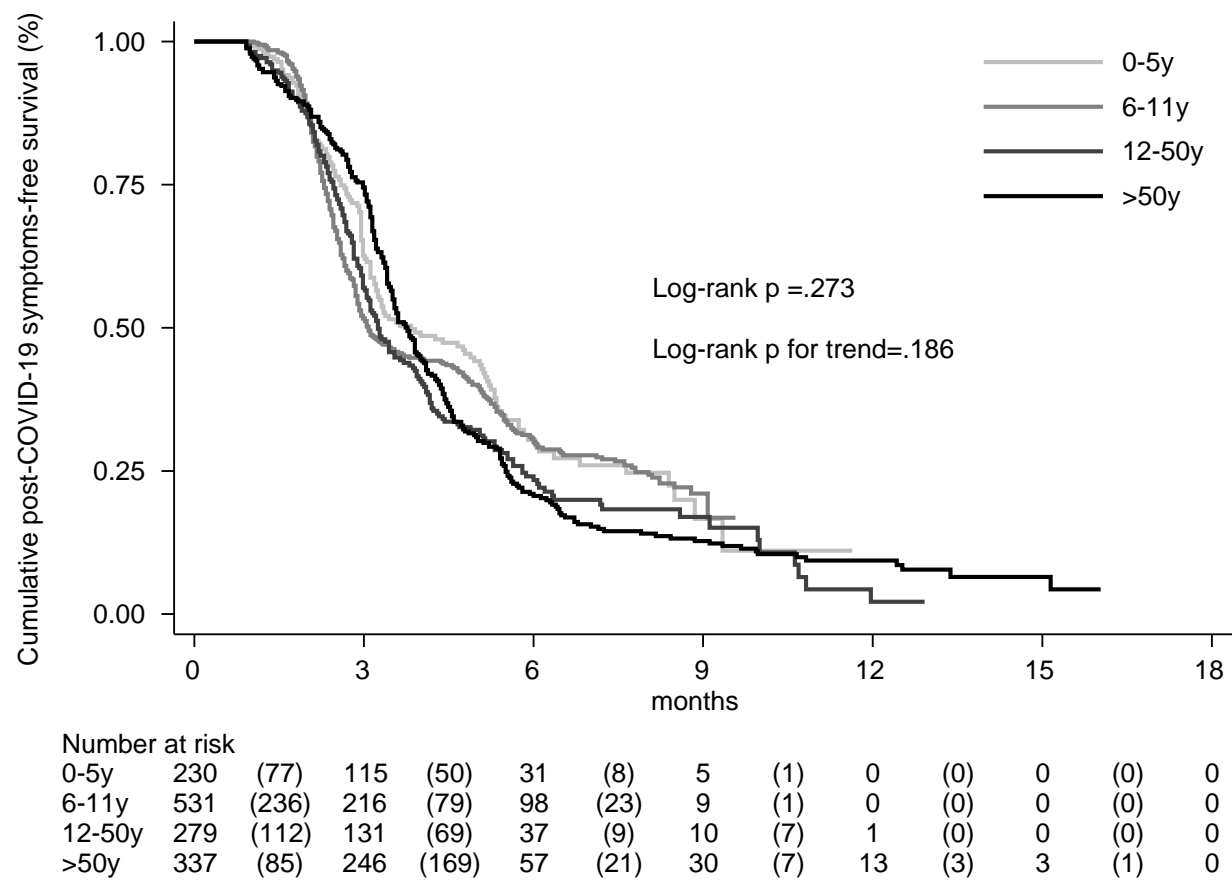

Figure S3

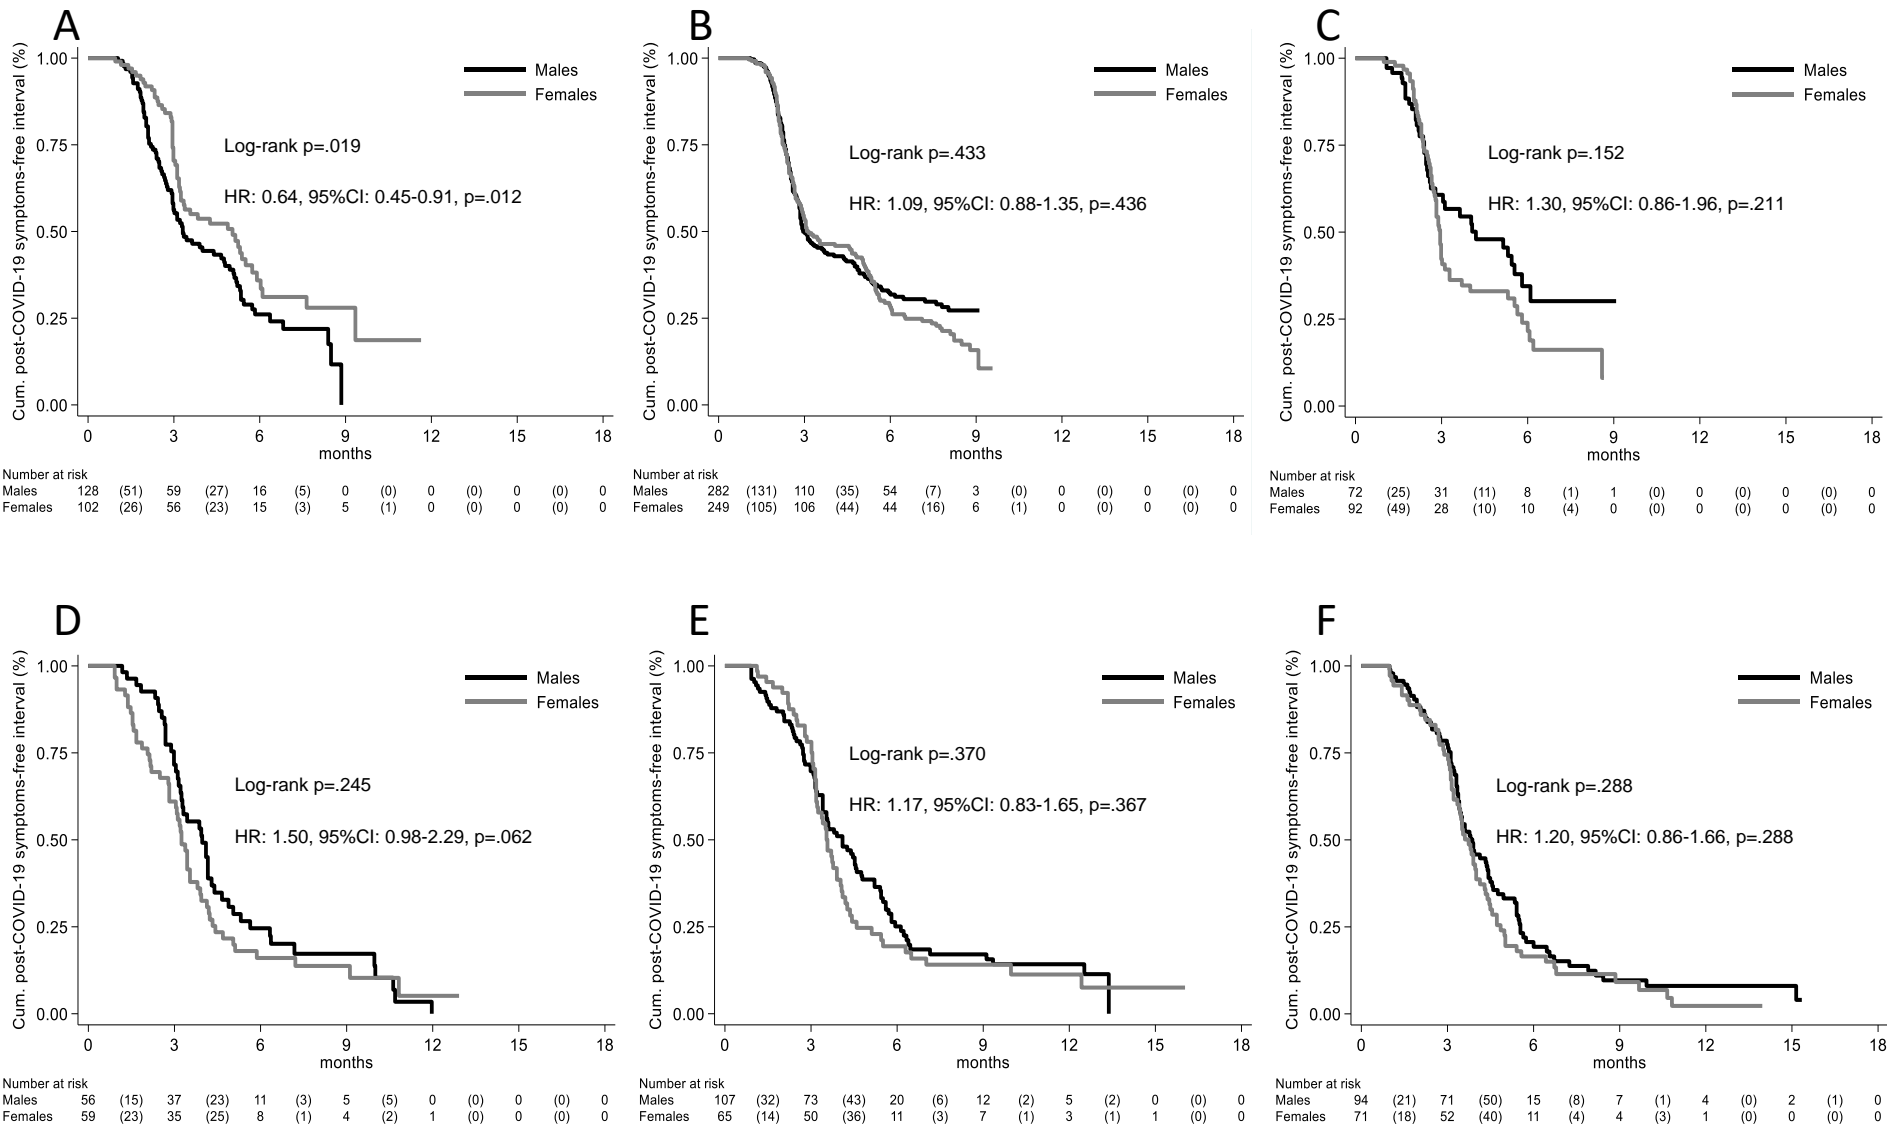

Figure S4

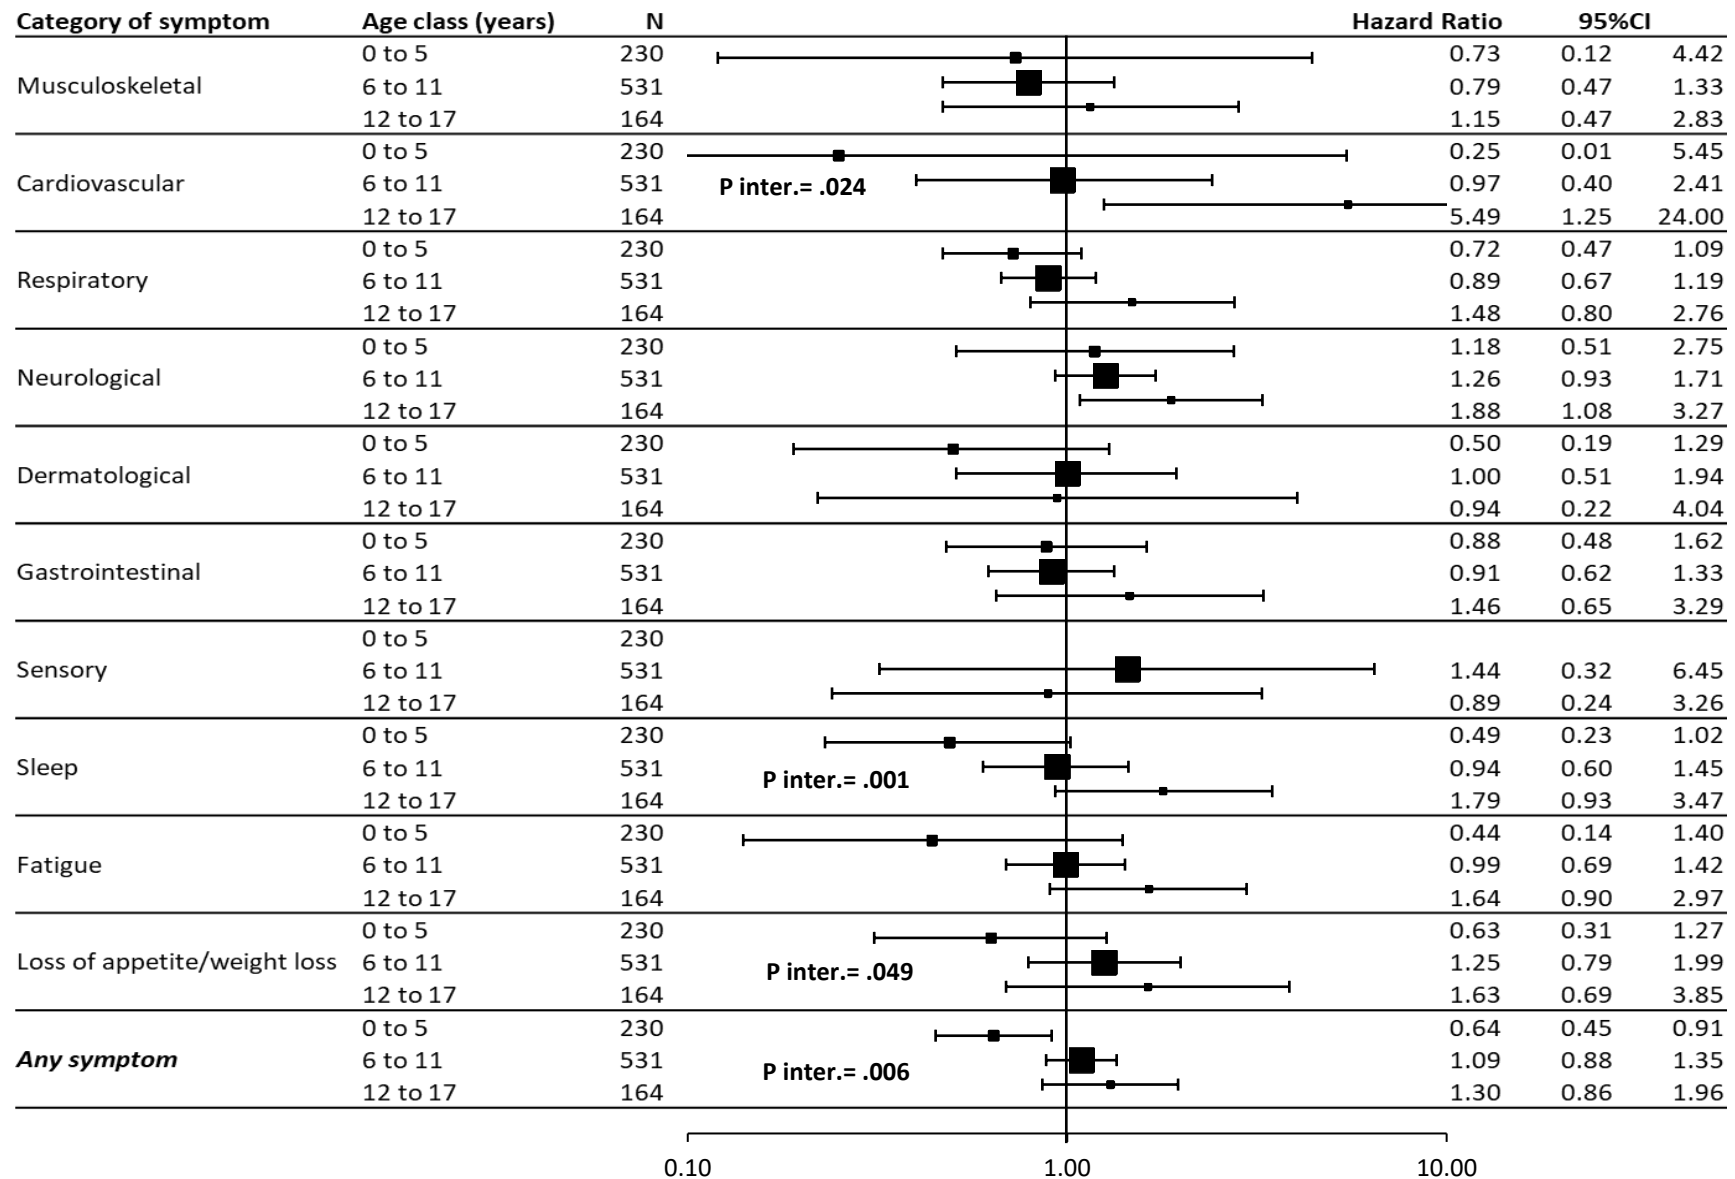

Figure S5

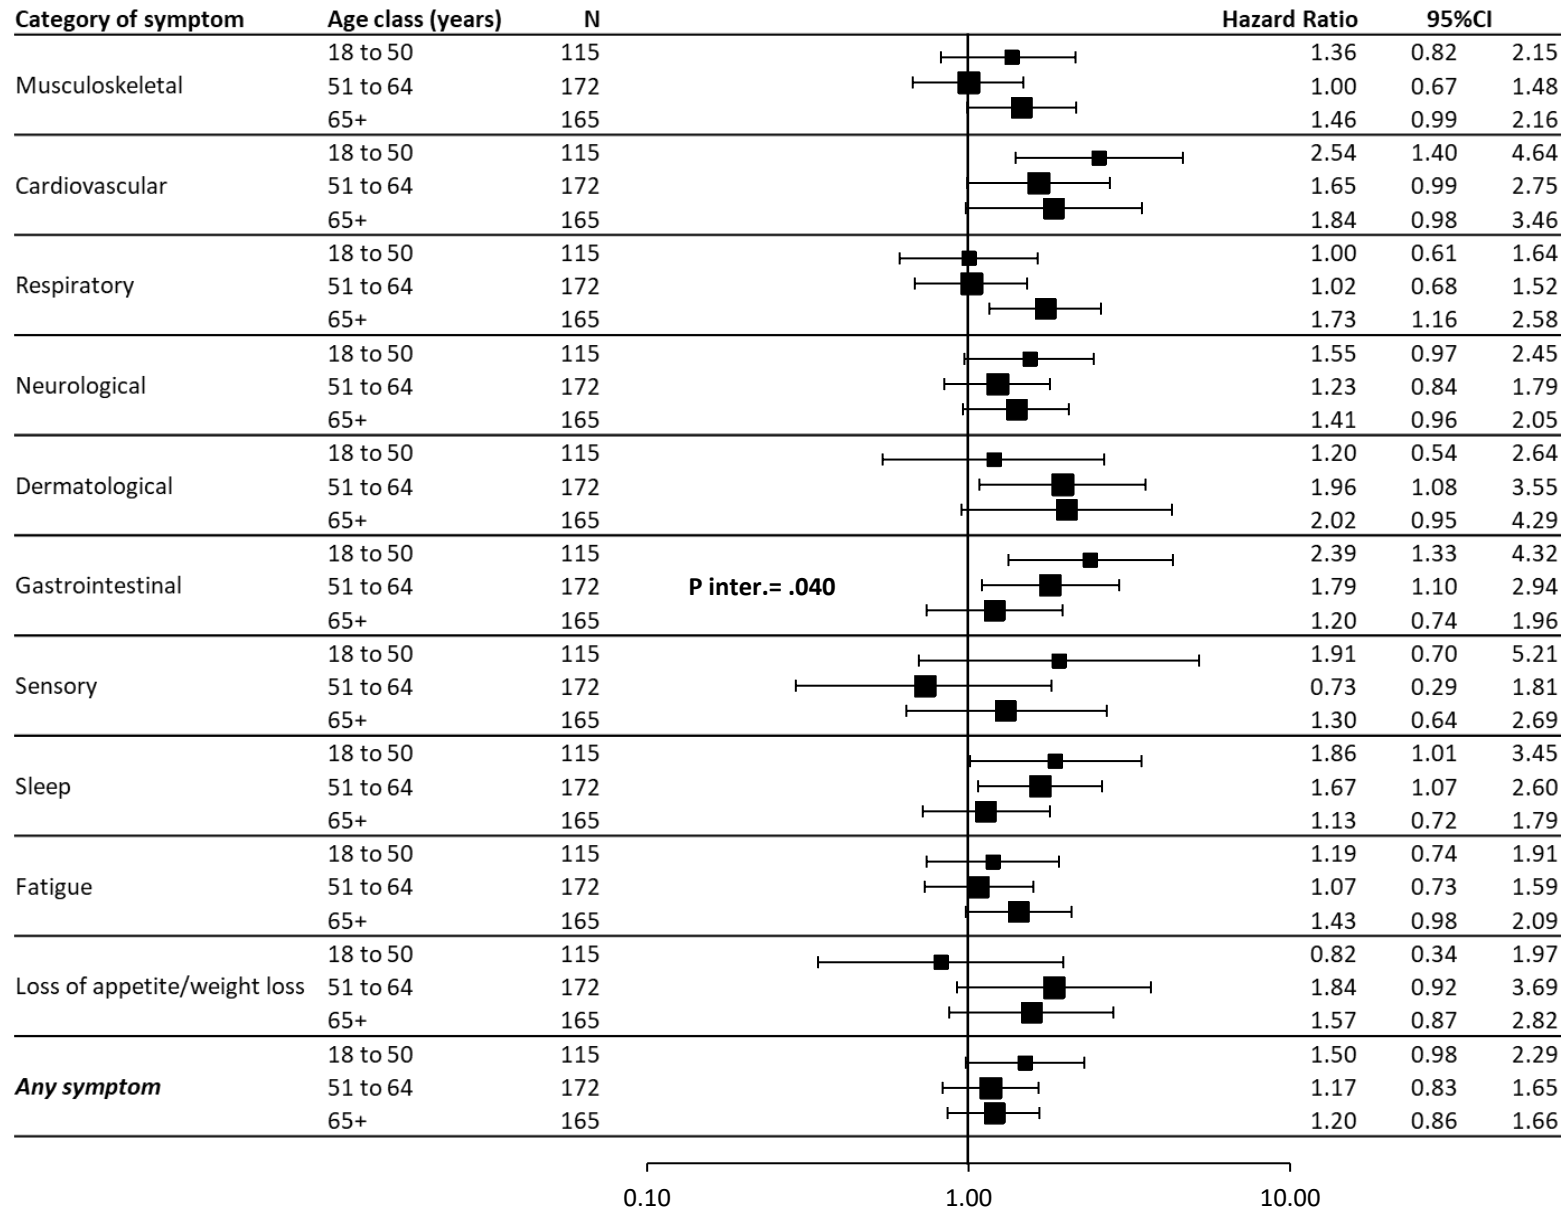

**Figure S6**

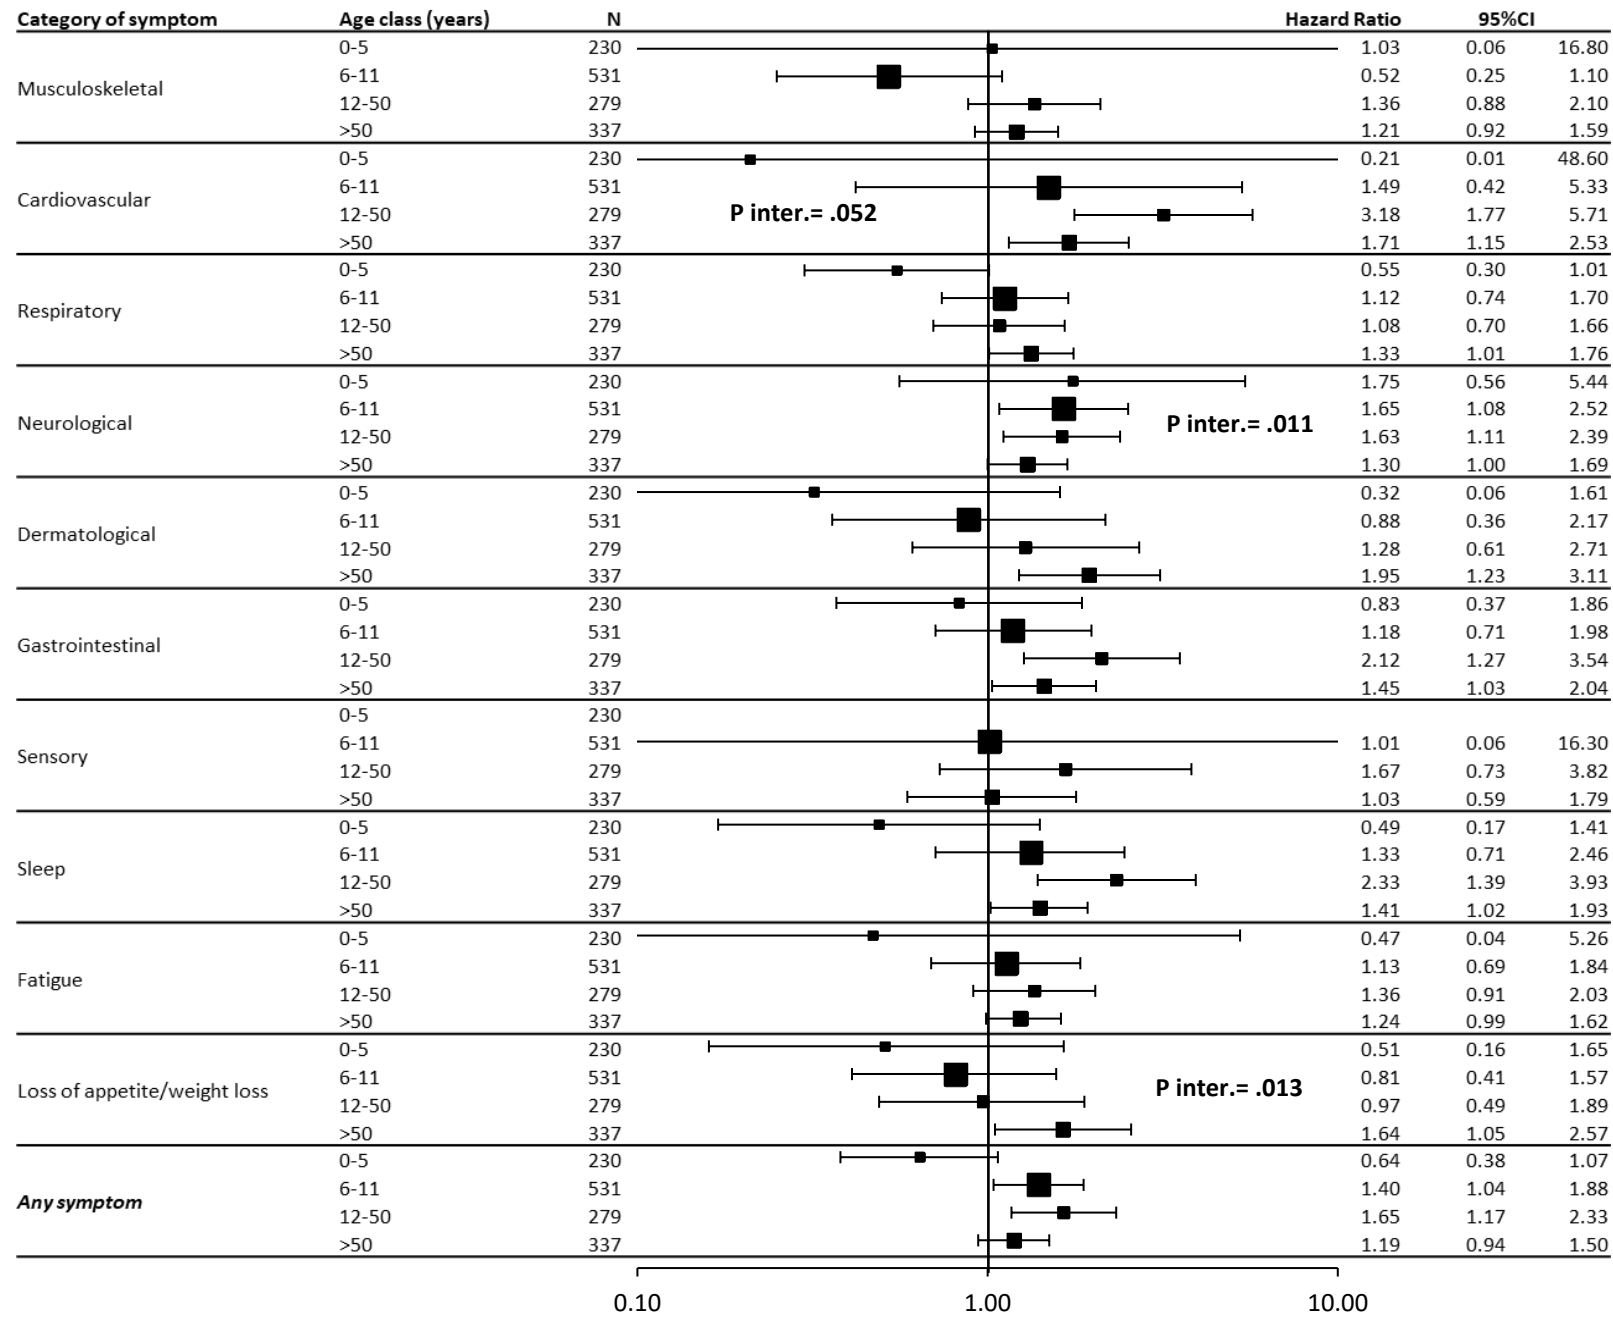

Figure S7

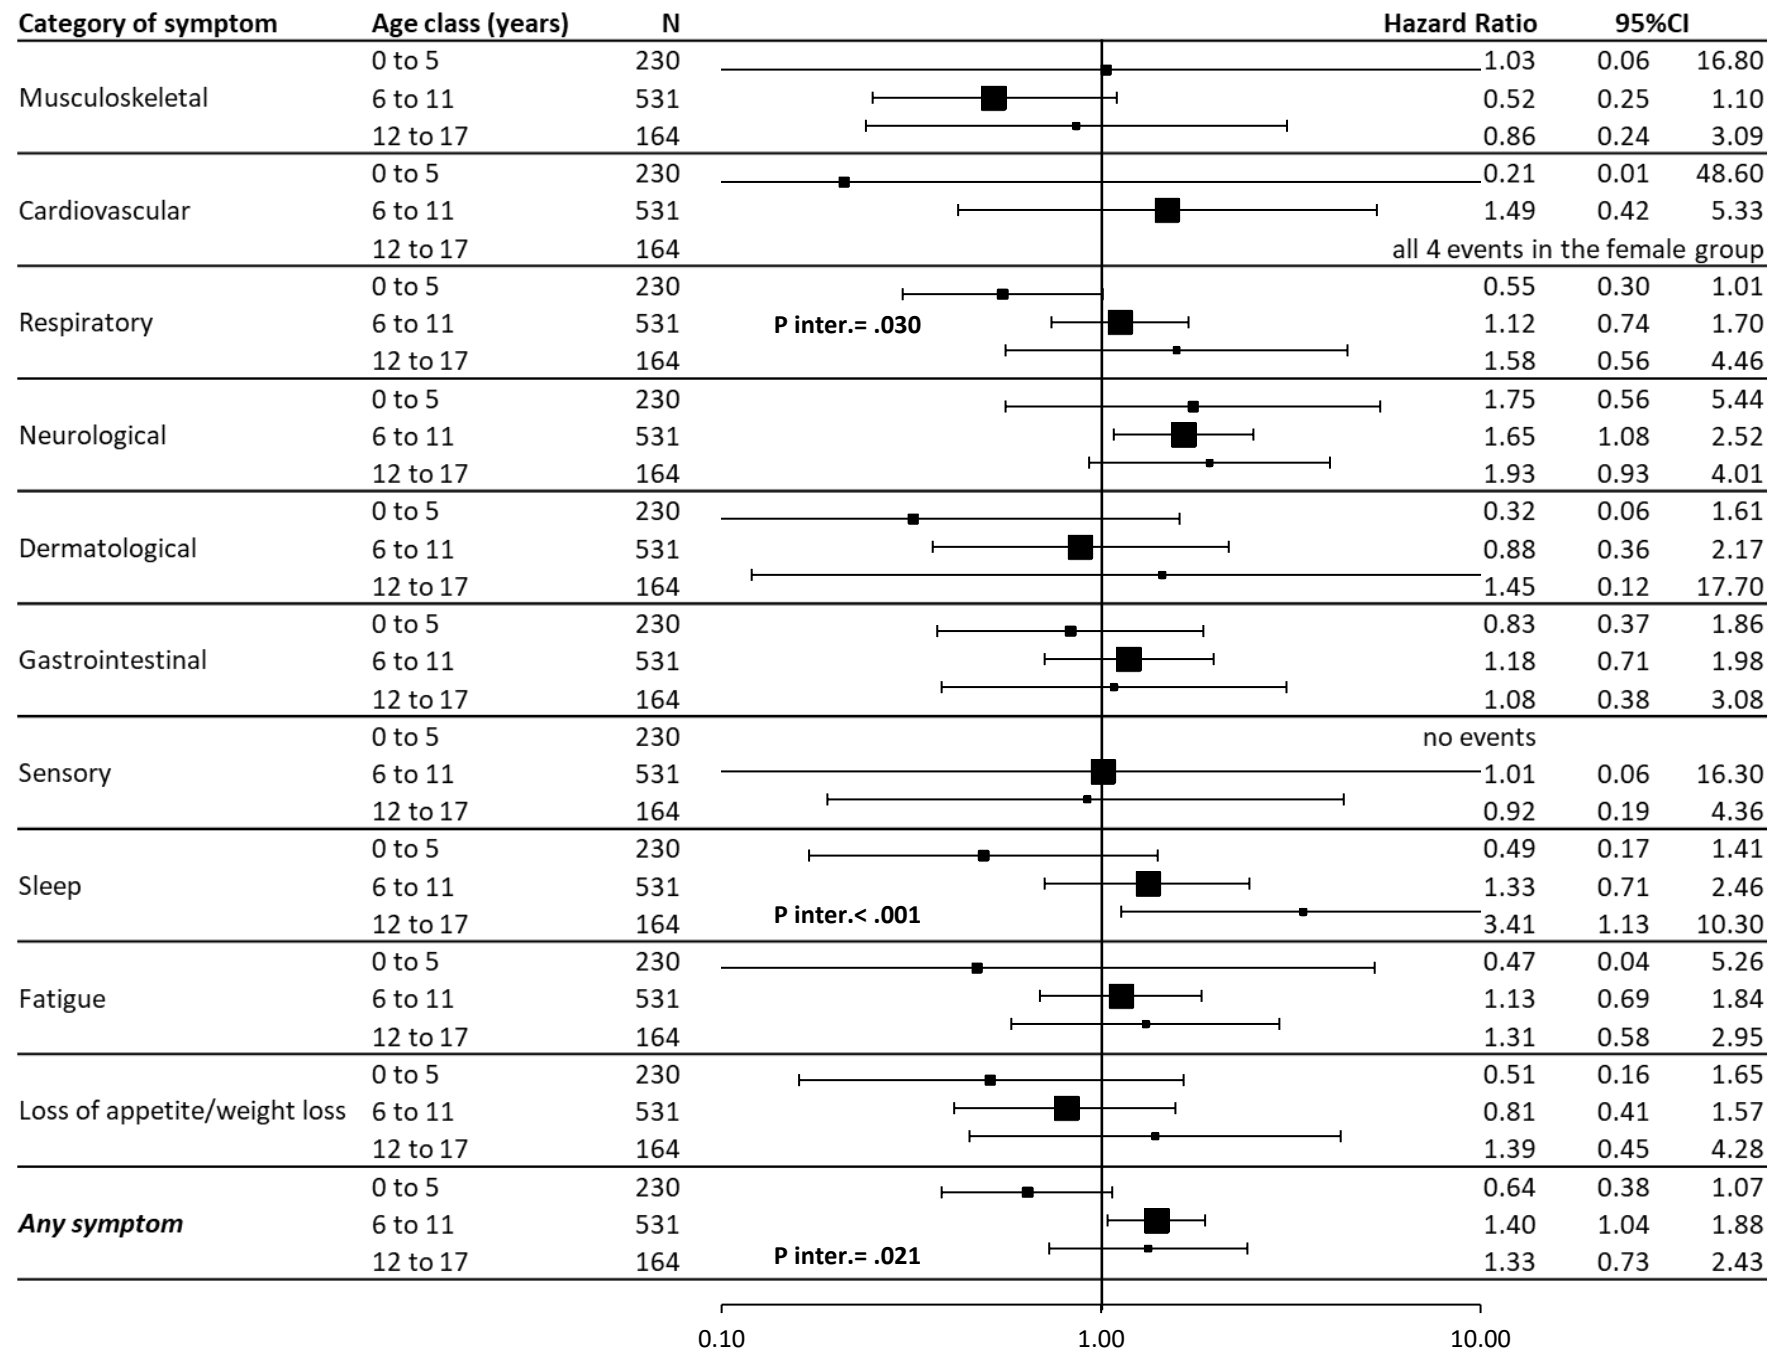

Supplement: s1 [file s1]
